# Supplementary material for: A Refined Culture System for Human Induced Pluripotent Stem Cell-Derived Intestinal Epithelial Organoids
Source: PubMed Central journal article supplement — Stem Cell Reports. 2017 Dec 7;10(1):314–28. doi: 10.1016/j.stemcr.2017.11.004 (PMC5768885; doi:10.1016/j.stemcr.2017.11.004), 2017-12-07
Supplement: mmc1.pdf [file mmc1.pdf]

**Stem Cell Reports, Volume 10**

**Supplemental Information**

**A Refined Culture System for Human Induced Pluripotent Stem Cell-Derived Intestinal Epithelial Organoids**

**Yu Takahashi, Shintaro Sato, Yosuke Kurashima, Tomohisa Yamamoto, Shiho Kurokawa, Yoshikazu Yuki, Naoki Takemura, Satoshi Uematsu, Chen-Yi Lai, Makoto Otsu, Hiroshi Matsuno, Hideki Osawa, Tsunekazu Mizushima, Junichi Nishimura, Mikio Hayashi, Takayuki Yamaguchi, and Hiroshi Kiyono**

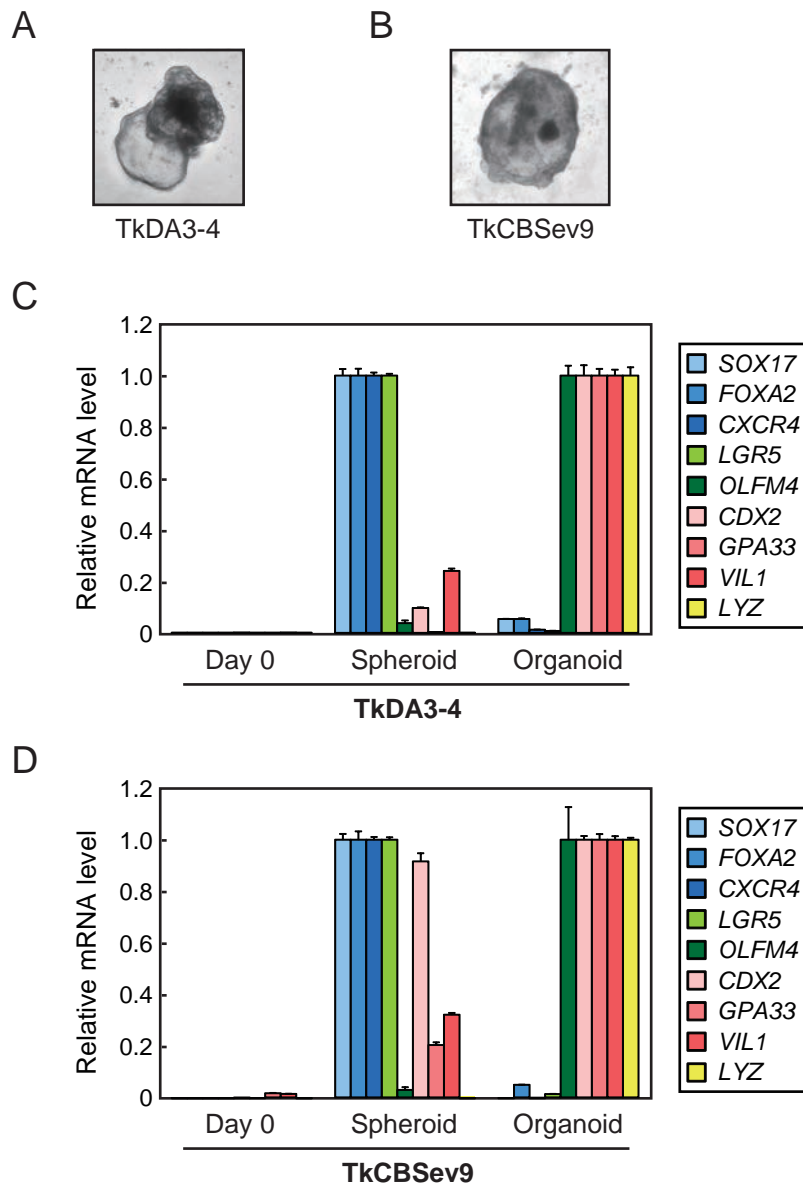

**Figure S1. Differentiation of TkDA3-4 and TkCBSev9 into intestinal organoids, related to Figure 2.** Human iPS cell lines, TkDA3-4 and TkCBSev9, were differentiated into spheroids and organoids with recombinant hWNT3A and hFGF2 during the initial stage of the differentiation as described in “Experimental Procedures”. (A and B) Each magnified image of organoid-like cell clumps was taken by bright field microscopy. (C and D) The cells were harvested during the course of differentiation (days 0, 8 [spheroids], and organoids). Relative mRNA levels were determined by quantitative RT-PCR and normalized to *HPRT*. The highest expression levels of each gene in each differentiation stage were considered as “1”. The assays were performed in three independent biological replicates. Data are presented as means  $\pm$  SEM.

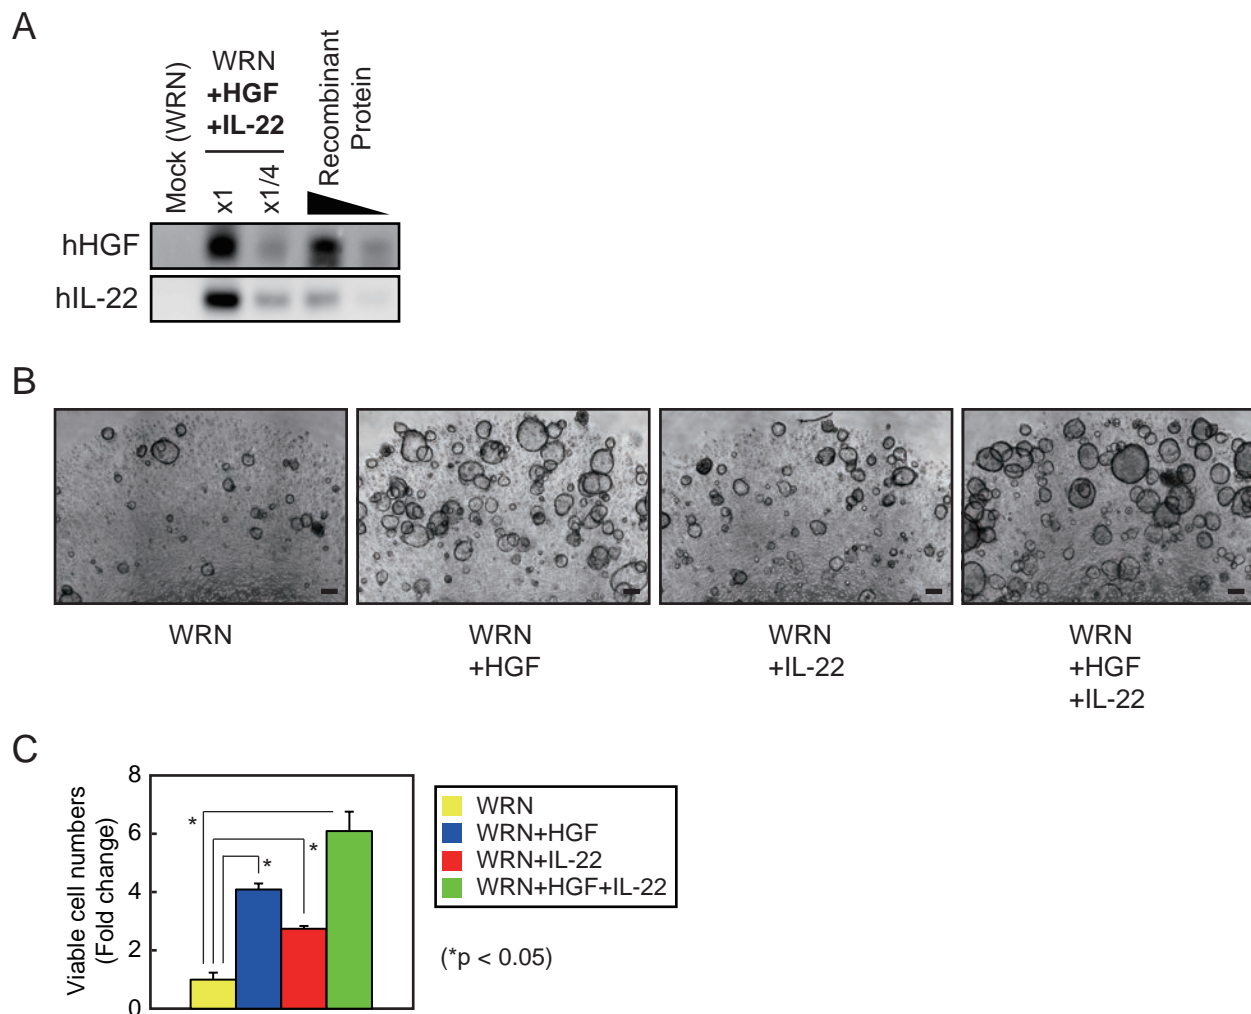

**Figure S2. Preparation and characterization of WRN with HGF and/or IL-22 CM, related to Discussion.** Mouse L-WRN cells established as in Figure 1 were further infected with lentiviruses for hHGF and/or hIL-22 expression. Each CM was prepared from the culture supernatants of the cells seeded at  $1.4 \times 10^6$  cells/35-mm dish for 72 hr. (A) Western blot analysis of WRN+HGF+IL-22 CM undiluted (10  $\mu$ L) and four-fold diluted, and the recombinant proteins HGF (1 and 0.25 ng) and IL-22 (0.2 and 0.05 ng) using anti-HGF and anti-IL-22 antibodies. (B) Bright-field images of TkDN4-M-derived organoids cultured with each conditioned medium for 7 days in Matrigel after seeded at 5,000 cells/well. Scale bars: 250  $\mu$ m. (C) Viable cell numbers as in (B) were determined using the CellTiter-Glo 3D reagent. The group of WRN in the absence of HGF and IL-22 was considered as “1”. The assay was performed in three independent biological replicates. Data are presented as mean  $\pm$  SEM, \* $p < 0.05$  (Dunnnett’s test).

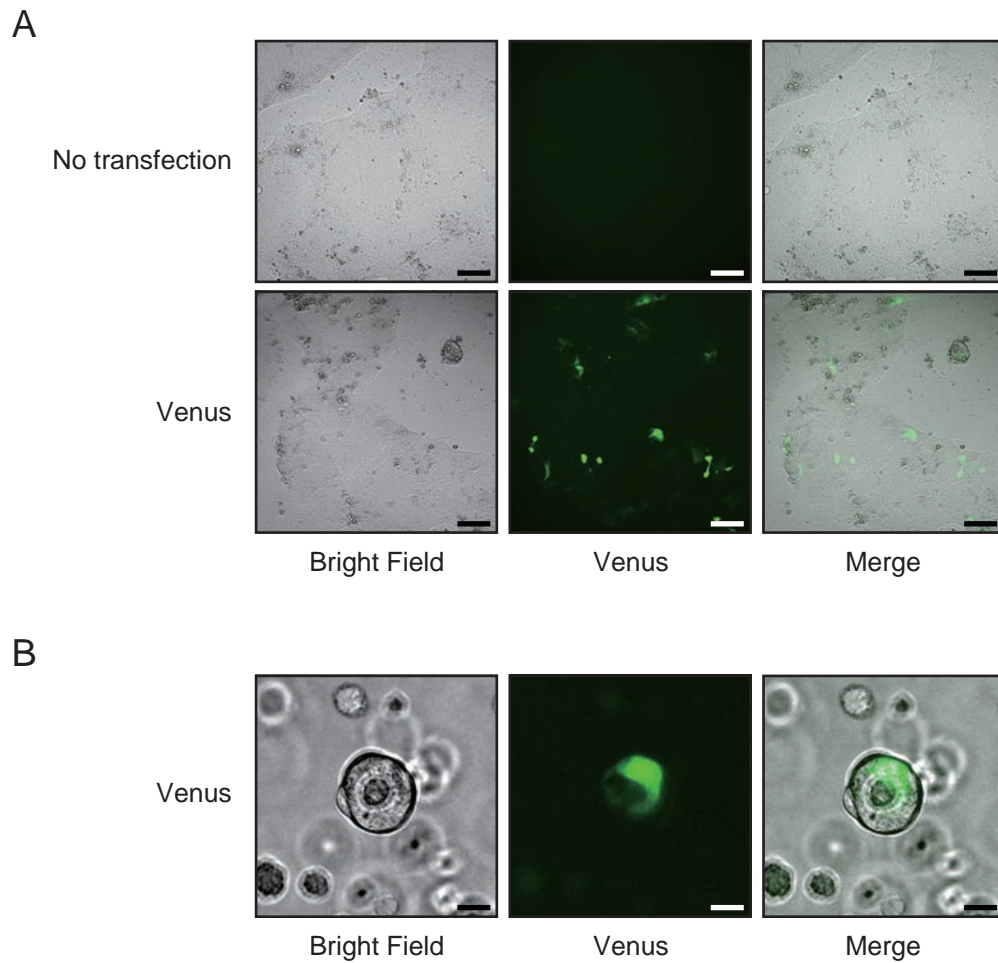

**Figure S3. Lipofection-mediated gene transfection in human intestinal organoids, related to Discussion.** TkDN4-M-derived organoids were disrupted by a 29G needle and seeded in a collagen I-coated 12-well plate. After a day of culture, the cells were transiently transfected with Venus expression plasmid (CSII-EF-MCS-IRES2-Venus, 1.2  $\mu\text{g}/\text{well}$ ) using Lipofectamine 2000 reagent (2.4  $\mu\text{L}/\text{well}$ ). (A) Bright-field and fluorescent images of proliferative cells were taken after 2 days of transfection. Scale bars: 100  $\mu\text{m}$ . (B) Two days after transfection, the cells were trypsinized, collected, and embedded in Matrigel. After 2 days of the culture, bright-field and fluorescent images of the regenerated organoids were taken. Scale bars: 20  $\mu\text{m}$ .

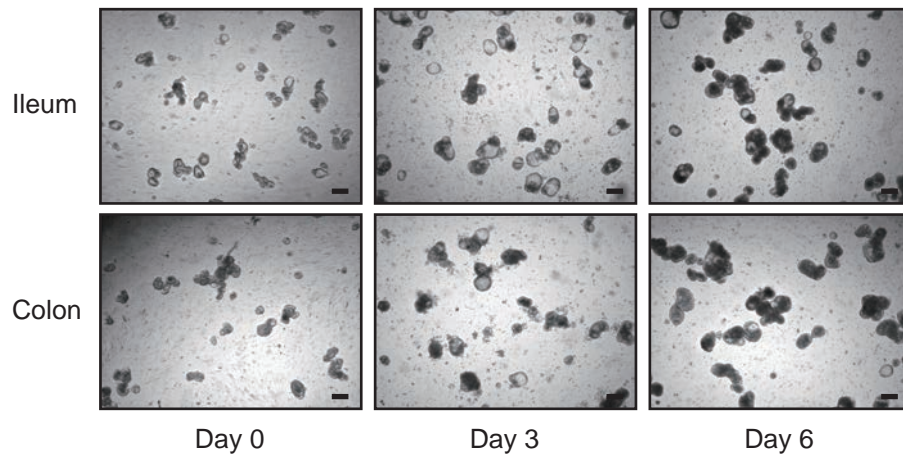

**Figure S4. Growth of human primary intestinal organoids in Happy Cell ASM, related to Discussion.** Human primary intestinal organoids derived from ileum or transverse colon were cultured in Happy Cell ASM supplemented with 25% WRN CM and requisite ingredients for human organoid culture (See Table S4). Bright-field images were taken during the course of the culture. Scale bars: 200  $\mu$ m.

**Table S3. List of materials used in this study, related to Experimental Procedures.**

| <b>Antibodies</b> | <b>Supplier</b>           | <b>Cat. No.</b> |
|-------------------|---------------------------|-----------------|
| Anti-WNT3A        | Abcam                     | ab28472         |
| Anti-VIL1         | Abcam                     | ab3304          |
| Anti-MUC2         | Abcam                     | ab11197         |
| Anti-CHGA         | Abcam                     | ab15160         |
| Anti-RSPO1        | Novus                     | NBP1-77354      |
| Anti-NOG          | Abnova                    | H00009241-B01   |
| Anti-LYZ          | Dako                      | A0099           |
| Anti-MKI67        | BD Pharmingen             | 550609          |
| Anti-HGF          | Cell Signaling Technology | 52445           |
| Anti-IL-22        | R&D Systems               | AF782           |

| <b>Recombinant proteins</b> | <b>Supplier</b> | <b>Cat. No.</b> |
|-----------------------------|-----------------|-----------------|
| mouse EGF                   | Peprotech       | 315-09          |
| mouse NOG                   | Peprotech       | 250-38          |
| mouse WNT3A                 | R&D Systems     | 1324-WN         |
| mouse RSPO1                 | R&D Systems     | 3474-RS         |
| human FGF4                  | Peprotech       | 100-31          |
| human WNT3A                 | R&D Systems     | 5036-WN         |
| human HGF                   | R&D Systems     | 294-HG          |
| human IL-22                 | R&D Systems     | 782-IL          |
| human NOG                   | R&D Systems     | 6057-NG         |
| human FGF2                  | R&D Systems     | 233-FB          |
| Activin A                   | R&D Systems     | 338-AC          |

| <b>Supplements for cell culture</b> | <b>Supplier</b> | <b>Cat. No.</b> |
|-------------------------------------|-----------------|-----------------|
| Matrigel                            | Corning         | 354234          |
| Collagen Gel Culture Kit            | Nitta Gelatin   | 638-00781       |
| Y-27632                             | Wako            | 257-00511       |
| SB202190                            | Sigma           | S7067           |
| A83-01                              | Tocris          | 2939            |
| Defined FBS                         | HyClone         | SH30070.03      |
| Knockout serum replacement          | Gibco           | 10828028        |
| Vitronectin                         | Gibco           | A14700          |

|             |                |          |
|-------------|----------------|----------|
| Forskolin   | Sigma          | F6886    |
| Polybrene   | Sigma          | 107689   |
| Mitomycin C | Nacalai tesque | 20898-21 |

**Table S4. Culture medium and buffer used in the study, related to Experimental Procedures.**

|                                          |                                                                                                                                                                                                                                              |
|------------------------------------------|----------------------------------------------------------------------------------------------------------------------------------------------------------------------------------------------------------------------------------------------|
| Chelation buffer                         | 2 mM EDTA, 5.6 mM Na <sub>2</sub> HPO <sub>4</sub> , 8.0 mM KH <sub>2</sub> PO <sub>4</sub> , 96.2 mM NaCl, 1.6 mM KCl, 43.4 mM sucrose, 54.9 mM D-sorbitol, 0.5 mM DL-dithiothreitol                                                        |
| iPSC maintenance medium                  | DMEM and Ham's nutrient mixture F-12 with 20% knockout serum replacement, 0.1 mM 2-mercaptoethanol, 2 mM L-glutamine, 1% non-essential amino acid solution, 4 ng/mL hFGF2, 100 units/mL penicillin, and 100 µg/mL streptomycin               |
| DE1 medium                               | Roswell Park Memorial Institute (RPMI) 1640 with 2 mM L-glutamine, 100 ng/mL activin A, and 20 ng/mL hWNT3A                                                                                                                                  |
| DE2 medium                               | RPMI 1640 with 2 mM L-glutamine, 100 ng/mL activin A, 8 ng/mL hFGF2, and 0.2% defined FBS                                                                                                                                                    |
| DE3 medium                               | RPMI 1640 with 2 mM L-glutamine, 100 ng/mL activin A, 8 ng/mL hFGF2, and 2% defined FBS                                                                                                                                                      |
| mid- and hindgut differentiation medium  | RPMI 1640 supplemented with 2 mM L-glutamine, 2% defined FBS, 500 ng/mL hFGF4, and 500 ng/mL hWNT3A                                                                                                                                          |
| intestine growth medium                  | Advanced DMEM/F12 supplemented with 15 mM HEPES (pH 7.3), 1×B-27, 1×N2, 2 mM L-Glutamine, 100 ng/mL mouse EGF (mEGF), 500 ng/mL mRSPO1, 100 ng/mL mNOG, 100 units/mL penicillin, and 100 µg/mL streptomycin                                  |
| basal medium                             | Advanced DMEM/F12 supplemented with 10 mM HEPES (pH 7.3), 1×B-27, 1×N2, 2 mM Glutamax, 100 units/mL penicillin, and 100 µg/mL streptomycin                                                                                                   |
| human organoid culture medium            | Advanced DMEM/F12 with 25% WRN CM, 10 mM HEPES (pH 7.3), 1% BSA, 2 mM Glutamax, 50 ng/mL mEGF, 50 ng/mL hHGF, 10 µM Y-27632, 10 µM SB202190, 500 nM A83-01, 100 µg/mL gentamicin, 100 units/mL penicillin, and 100 µg/mL streptomycin        |
| pre-culture medium                       | Advanced DMEM/F12 with 10 mM HEPES (pH 7.3), 1% BSA, 2 mM Glutamax, 50 ng/mL mEGF, 10 µM Y-27632, 10 µM SB202190, 500 nM A83-01, 100 µg/mL gentamicin, 100 units/mL penicillin, and 100 µg/mL streptomycin                                   |
| pre-stimulation medium                   | Advanced DMEM/F12 with 20% FBS, 10 mM HEPES (pH 7.3), 2 mM Glutamax, 100 units/mL penicillin, and 100 µg/mL streptomycin                                                                                                                     |
| Happy Cell human organoid culture medium | 1×Happy Cell (DMEM base) with 25% WRN CM, 10 mM HEPES (pH 7.3), 1% BSA, 2 mM Glutamax, 50 ng/mL mEGF, 50 ng/mL hHGF, 10 µM Y-27632, 10 µM SB202190, 500 nM A83-01, 100 µg/mL gentamicin, 100 units/mL penicillin, and 100 µg/mL streptomycin |



|                                   |                                                                                                                                 |
|-----------------------------------|---------------------------------------------------------------------------------------------------------------------------------|
| Happy Cell pre-stimulation medium | 1×Happy Cell (DMEM base) with 20% FBS, 10 mM HEPES (pH 7.3), 2 mM Glutamax, 100 units/mL penicillin, and 100 µg/mL streptomycin |
|-----------------------------------|---------------------------------------------------------------------------------------------------------------------------------|

## **Supplemental Experimental Procedures**

### **Cell culture**

HEK293T cells and L cells were obtained from ATCC. Both cell lines were cultured in DMEM with 10% FBS, 100 units/mL penicillin, and 100 µg/mL streptomycin. All cultures were incubated at 37°C in 95% humidity with 5% CO<sub>2</sub>.

The human induced-pluripotent stem cell (iPSC) lines TkDN4-M (Takayama et al., 2010), TkCBSev9 (Yagyū et al., 2015), and TkDA3-4 (Takayama et al., 2010) were supplied by The University of Tokyo. TkDN4-M and TkCBSev9 cells were maintained as colonies in feeder-free conditions on vitronectin (Gibco)-coated plates with Essential 8 medium (Gibco); and TkDA3-4 cells were maintained on a layer of mitomycin C-treated mouse embryonic fibroblasts (feeder cells) in iPSC maintenance medium (Table S4). The cells were passaged every three to four days before reaching confluence.

### **Differentiation of human iPSCs into intestinal organoids**

Organoids were differentiated from human iPSCs following a previously described protocol (McCracken et al., 2011), with small modifications. Briefly, 80%-90% confluent iPSCs were differentiated into definitive endoderm (DE) through treatment with DE1 medium (Table S4) for 24 hr, followed by DE2 medium (Table S4) for 24 hr, and then DE3 medium (Table S4) for a further 24 hr. For mid- and hindgut differentiation, DE cells were cultured in mid- and hindgut differentiation medium (Table S4) for up to four days. Free-floating spheroids were collected during the course of the culture, and transferred into three-dimensional cultures in Matrigel refed with intestine growth medium (Table S4), which was replaced every two to three days for 14 days. Organoids were collected after several passages, following the protocol described previously (Takahashi et al., 2017).

### **Lentiviral infection**

HEK293T cells were transfected with each lentiviral expression plasmid together with a packaging (pCAG-HIVgp) and VSV-G- and Rev-expressing plasmid (pCMV-VSV-G-RSV-Rev) using Lipofectamine 2000 Transfection Reagent (Thermo Fisher Scientific), according to the supplier's

protocols. After 6 hr, the culture medium was replaced by fresh medium with 10  $\mu$ M forskolin, and 48 hr later the medium containing lentiviruses was collected and filtered. The plasmids for lentiviral production were kindly provided by Dr. Hiroyuki Miyoshi (BioResource Center, RIKEN, Japan). Mouse L cells and organoid-derived 2D-cultured cells seeded in 6-well plates and 12-well plates, respectively, were infected with the medium supplemented with 10  $\mu$ g/mL polybrene using a centrifugation method (2,500 rpm for 90 min). Following centrifugation, the cells were refed with fresh culture medium. Direct infection into organoids was conducted by incubating viral solution with recovered organoids for 90 min in 15 mL tubes.

### **Determination of cell viability**

To measure the exact cell numbers, Matrigel-embedded TkDN4-M-derived organoids were incubated with TrypLE Express (Gibco), including 10  $\mu$ M Y-27632, for 5 min at 37°C, pipetted 20–30 times, and collected by centrifugation at  $440 \times g$  for 5 min after the addition of five times the volume of a base medium with 10% FBS and filtration through a 20- $\mu$ m nylon mesh. Five thousand cells were resuspended in Matrigel with 20% human organoid culture medium, excluding HGF, and placed into a well of a 24-well plate. After 7 days of the culture with pre-culture medium (Table S4) supplemented with each 25% CM (WRN, WRN+HGF, WRN+IL-22, WRN+HGF+IL-22), each group of organoids was collected and dispersed with TrypLE Express, including 10  $\mu$ M Y-27632. After centrifugation at  $440 \times g$  for 5 min, cells were resuspended in 100  $\mu$ L of base medium supplemented with 10% FBS, and viable cell numbers were determined using the CellTiter-Glo® 3D reagent (Promega) according to the manufacturer's protocol. The assays were performed in three independent biological replicates.

### **TCF reporter assay**

HEK293T cells were seeded in 60-mm dishes and transfected with 1  $\mu$ g TOPflash (Upstate Cell Signaling Solutions) and 1  $\mu$ g pGL4.74 (hRluc/TK) (Promega) with or without 2  $\mu$ g of an hR-spo1 expression plasmid (pVITRO2-hygro-mcs, InvivoGen). After 24 hr, the cells were reseeded in 96-well plates and further cultured for 8 hr. The medium was refed with WRN CM or medium containing recombinant proteins. Firefly and Renilla luciferase activities were quantified 14 hr later using a Dual-Luciferase™ reporter system (Promega), according to the manufacturer's instructions. Luciferase activities were

obtained by normalizing the firefly luciferase activities with Renilla luciferase activities. The assays were performed in three independent biological replicates.

### **Western blot analysis**

Culture supernatants were subjected to sodium dodecyl sulfate polyacrylamide gel electrophoresis and transferred onto a polyvinylidene difluoride membrane. The membrane was blocked with Blocking One (Nacalai Tesque, Japan) for 1 hr at room temperature, and then was incubated with primary antibodies against WNT3A, RSPO1, NOG, HGF, and IL-22 at a ratio of 1:1000, 1:500, 1:500, 1:1000, and 1:200, respectively. Following the incubation with HRP-conjugated secondary antibodies (1:5000, Jackson ImmunoResearch Laboratories), the immunoreactive proteins were visualized using ECL Prime Western Blotting Detection Reagent (GE Healthcare), and detected by a LAS4000mini image analyzer (GE Healthcare).

### **Quantitative reverse transcription polymerase chain reaction (RT-PCR)**

Total cellular RNA was extracted from the cells using the RNeasy® Mini Kit (QIAGEN), and reverse transcription was performed using High-Capacity cDNA Reverse Transcription Kits (Applied Biosystems). mRNA levels were quantified by fluorescence real-time PCR on a StepOnePlus™ (Applied Biosystems) using TaqMan® Gene Expression Assays (Applied Biosystems) or PrimeTime® qPCR Assays (Integrated DNA Technologies). *GAPDH* mRNA or *HPRT1* mRNA levels were used as an internal control to normalize the mRNA levels of each gene. The assays were performed in three independent biological replicates.

### **Immunofluorescence staining**

The organoids were fixed and permeabilized using the Cytfix/Cytoperm™ Kit (BD Biosciences). The specimens were then incubated with primary antibodies (rabbit anti-LYZ (1:400), mouse anti-MUC2 (1:250), rabbit anti-CHGA (1:100), or mouse anti-MKI67 (1:50) antibodies) at 4°C overnight. After being washed three times with Perm/Wash Buffer, the organoid specimens were further incubated with Alexa Fluor 633-conjugated Phalloidin (1:100, Invitrogen), together with Cy3-conjugated donkey anti-mouse

IgG (1:100, Jackson ImmunoResearch Laboratories), Cy3-conjugated donkey anti-rabbit IgG (1:100, Jackson ImmunoResearch Laboratories), or Alexa Fluor 488-conjugated donkey anti-rabbit IgG (1:100, Jackson ImmunoResearch Laboratories) for 3 hr at 4°C. Fluorescence staining was visualized using a Leica TCS SP2 confocal laser-scanning microscope.

## **Supplemental References**

McCracken, K.W., Howell, J.C., Wells, J.M., and Spence, J.R. (2011). Generating human intestinal tissue from pluripotent stem cells in vitro. *Nat Protoc.* 6, 1920-1928.

Takahashi, Y., Sato, S., Kurashima, Y., Lai, C.Y., Otsu, M., Hayashi, M., Yamaguchi, T., and Kiyono, H. (2017). Reciprocal Inflammatory Signaling Between Intestinal Epithelial Cells and Adipocytes in the Absence of Immune Cells. *EBioMedicine.* 23, 34-45.

Takayama, N., Nishimura, S., Nakamura, S., Shimizu, T., Ohnishi, R., Endo, H., Yamaguchi, T., Otsu, M., Nishimura, K., Nakanishi, M., et al. (2010). Transient activation of c-MYC expression is critical for efficient platelet generation from human induced pluripotent stem cells. *J Exp Med.* 207, 2817-2830.

Yagyu, S., Hoyos, V., Del Bufalo, F., and Brenner, M.K. (2015). An Inducible Caspase-9 Suicide Gene to Improve the Safety of Therapy Using Human Induced Pluripotent Stem Cells. *Mol Ther.* 23, 1475-1485.
